# Supplementary material for: Environmental conditions regulate the impact of plants on cloud formation
Source: PubMed Central journal article supplement (PMC5321720; doi:10.1038/ncomms14067), 2017-02-20
Supplement: ncomms14067-s1.pdf [file ncomms14067-s1.pdf]

# 1 Supplementary Figures

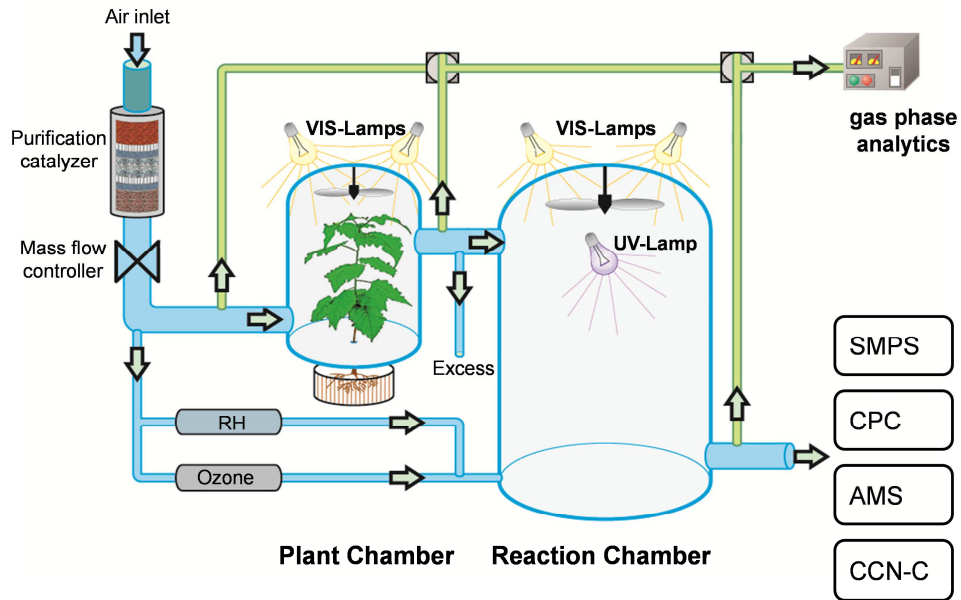

2

3 Supplementary Figure 1. **Schematic of the experimental setup.** Juelich Plant Atmosphere  
4 Chamber (JPAC) is shown. SMPS: scanning mobility particle sizer; CPC: condensation  
5 particle counter; AMS: aerosol mass spectrometer; CCN-C: cloud condensation nuclei  
6 counter; RH: relative humidity; Vis-lamp: visible light lamps.

7

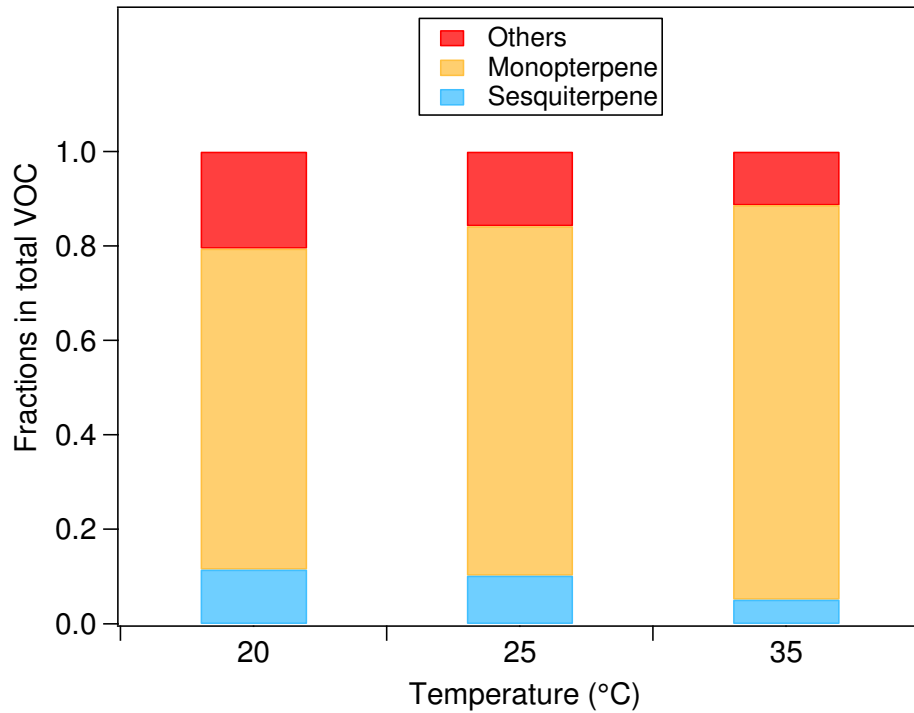

8

9 **Supplementary Figure 2. Volatile organic compounds composition of unstressed trees.**

10 Fractions of different classes of volatile organic compounds (VOC) in the total VOC  
11 emissions (ppbC) from pines in the absence of biotic stresses at different plant temperatures  
12 are shown. Blue, orange and red indicate the fractions of sesquiterpene, monoterpene and  
13 others (see Methods for detailed classification).

14

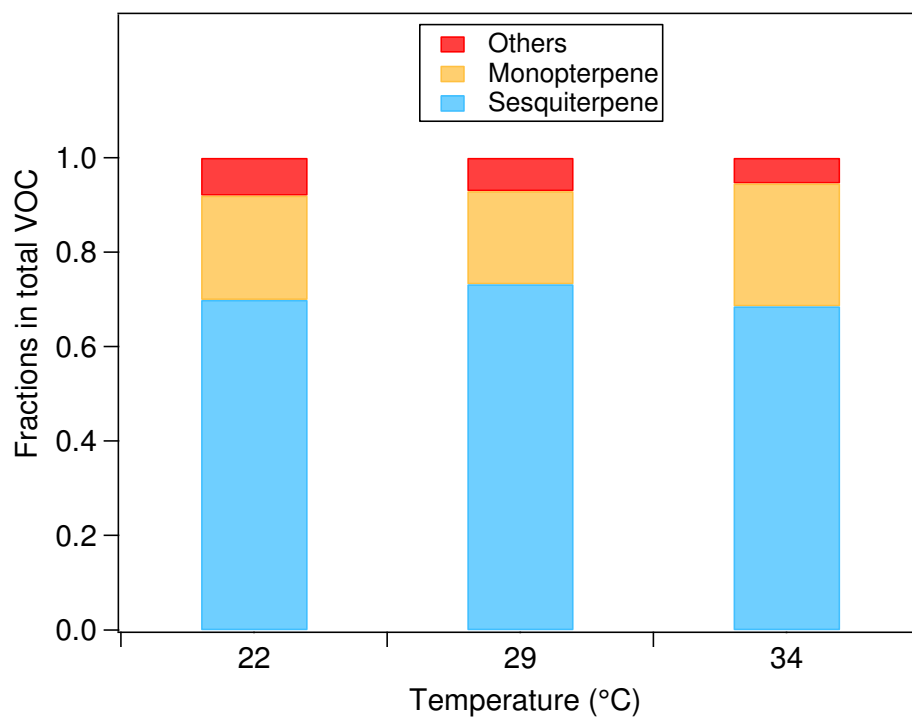

16

17 **Supplementary Figure 3. Volatile organic compounds composition of biotically-stressed**  
18 **trees.** Fractions of different classes of volatile organic compounds in total VOC emissions  
19 from boreal forest trees under biotic stresses at different plant temperature are shown. Blue,  
20 orange and red indicate the fractions of sesquiterpene, monoterpene and others (see Methods  
21 for detailed classification).

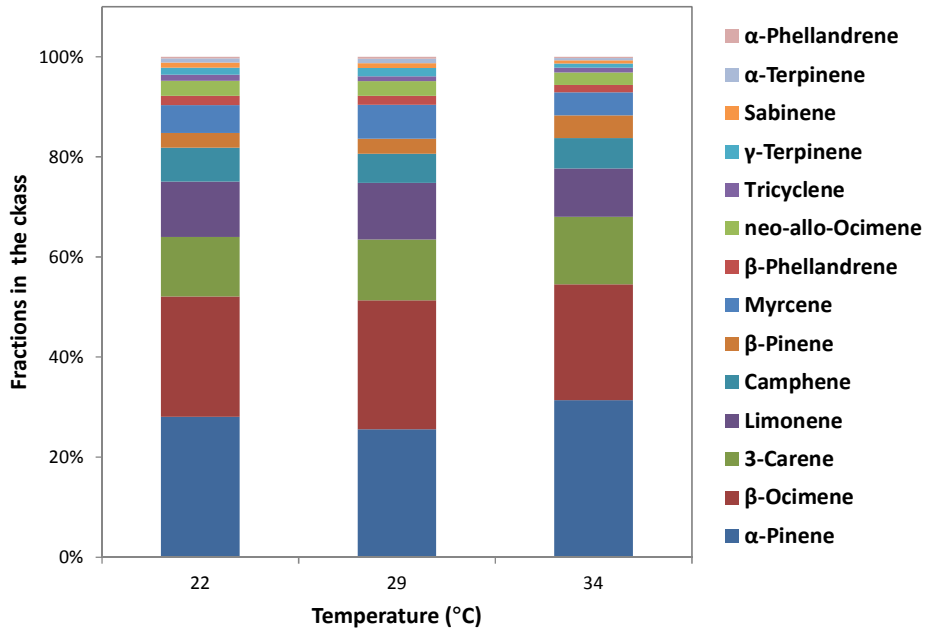

22

23

(a)

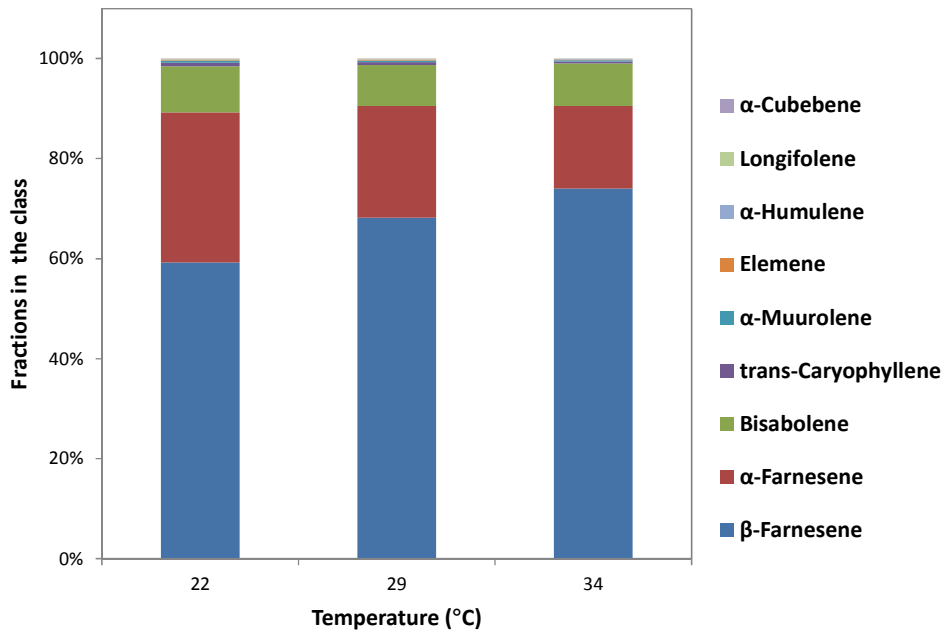

24

25

(b)

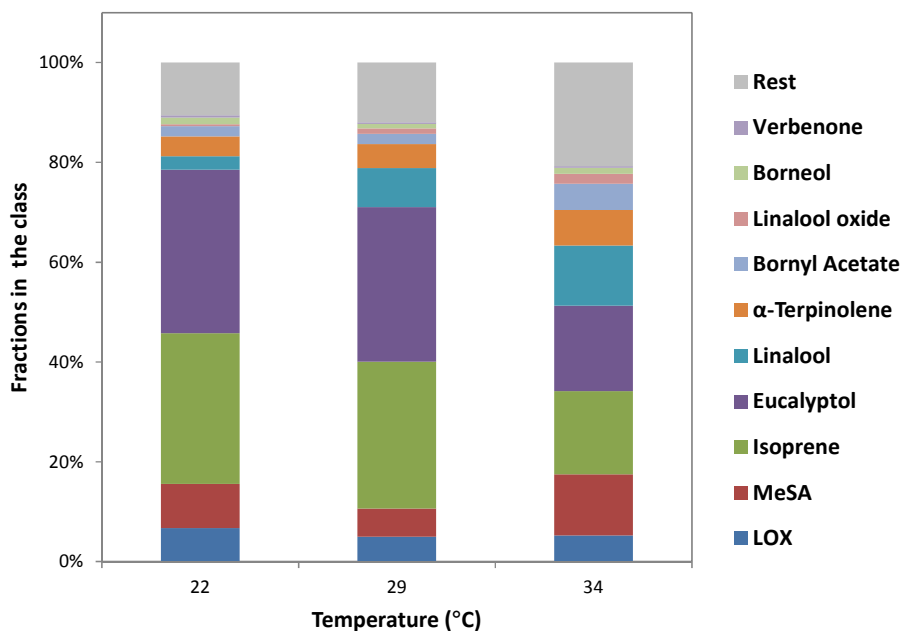

26

27

(c)

28 Supplementary Figure 4. **Detailed volatile organic compounds composition at different**  
 29 **temperature.** Fractions of different compounds in each classes for monoterpenes (a),  
 30 sesquiterpenes (b), and other compounds (c) (see Supplementary Figure 3) for boreal forest  
 31 trees under biotic stresses at different plant temperature are shown. See the Methods for the  
 32 details of volatile organic compounds classification.

33

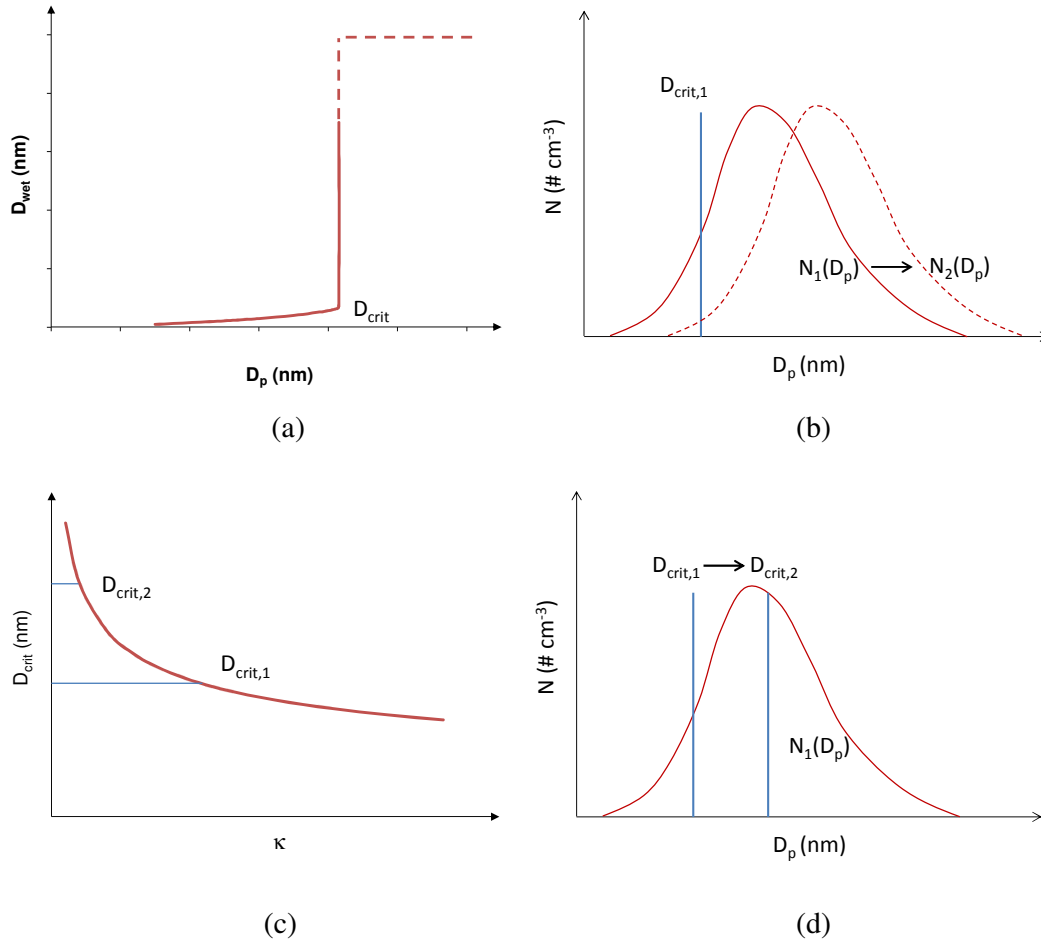

38 **Supplementary Figure 5. Effects of particle size and  $\kappa$  on cloud condensation nuclei**  
 39 **concentrations.** Panel a shows the size of the cloud droplet ( $D_{wet}$ ) that at given  
 40 supersaturation ( $SS=RH-100\%$ ) a dry particle of given chemical composition can grow to  
 41 from subsaturated condition as a function of particle size. The dash line indicates that the  
 42 final droplet size is uncertain, depending on dynamic conditions in clouds.  $D_{crit}$  is the critical  
 43 activation diameter, which is defined as the particle size above which the droplet formed can  
 44 grow spontaneously to large droplets and the particle is considered to have activated into a  
 45 cloud droplet. Panel b shows that for given particle numbers as a function of size (particle  
 46 size distribution, solid line), how cloud condensation nuclei (CCN) concentration is derived  
 47 as the total number of particles larger than the critical activation diameter  $D_{crit,1}$ , i.e. the  
 48 integral of the part of the size distribution  $N_1(D_p)$  that is larger than  $D_{crit,1}$  (blue line). The  
 49 dash line shows a larger particle size distribution  $N_2(D_p)$  that the particle size distribution  
 50 shifts from  $N_1(D_p)$ . Panel c shows  $D_{crit}$  as a function of  $\kappa$  at a given supersaturation. The blue  
 51 lines indicates the critical diameter  $D_{crit,1}$  and  $D_{crit,2}$  for a higher and lower  $\kappa$ , respectively.

52 Panel d shows the effect of an increase of  $D_{\text{crit}}$  from  $D_{\text{crit},1}$  to  $D_{\text{crit},2}$  on the CCN concentration  
53 (number of particles larger than  $D_{\text{crit}}$ ). The blue lines indicate  $D_{\text{crit},1}$  and  $D_{\text{crit},2}$ , respectively.  
54

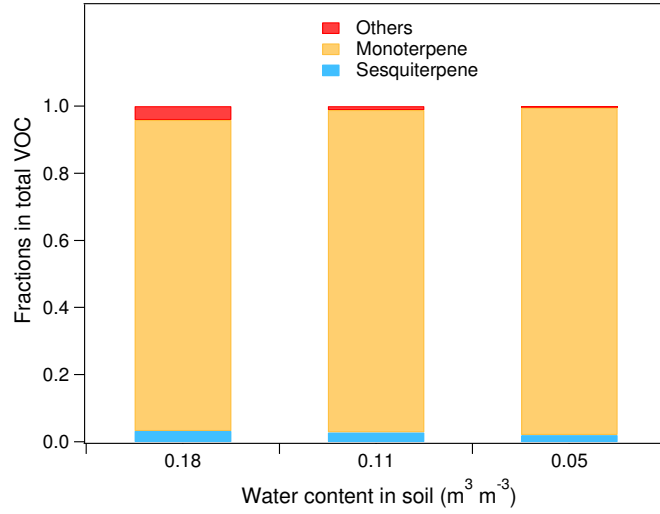

55  
56

(a)

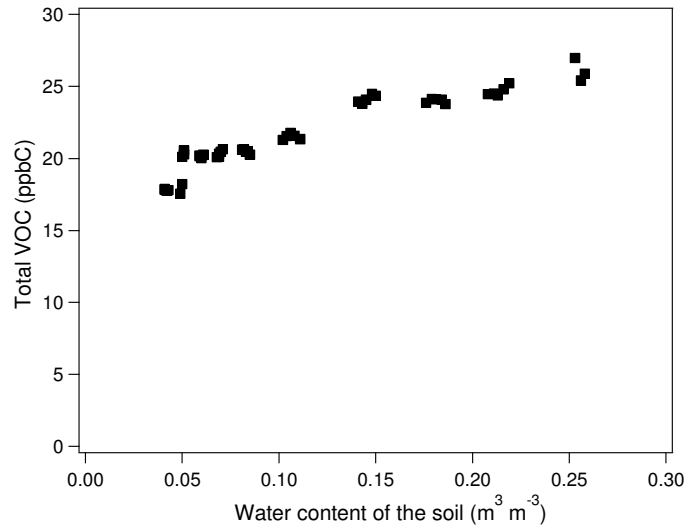

57  
58

(b)

59 **Supplementary Figure 6. Effect of drought on volatile organic compounds emissions.** (a).  
 60 Fractions of different classes of volatile organic compounds (VOC) in total VOC emissions  
 61 from a pine at different levels of water shortage. The blue, orange and red indicate the  
 62 fractions of sesquiterpene, monoterpene and others (see Methods for detailed classification).  
 63 (b). The concentration of total VOC (ppbC) emitted as a function of water content in the soil.  
 64



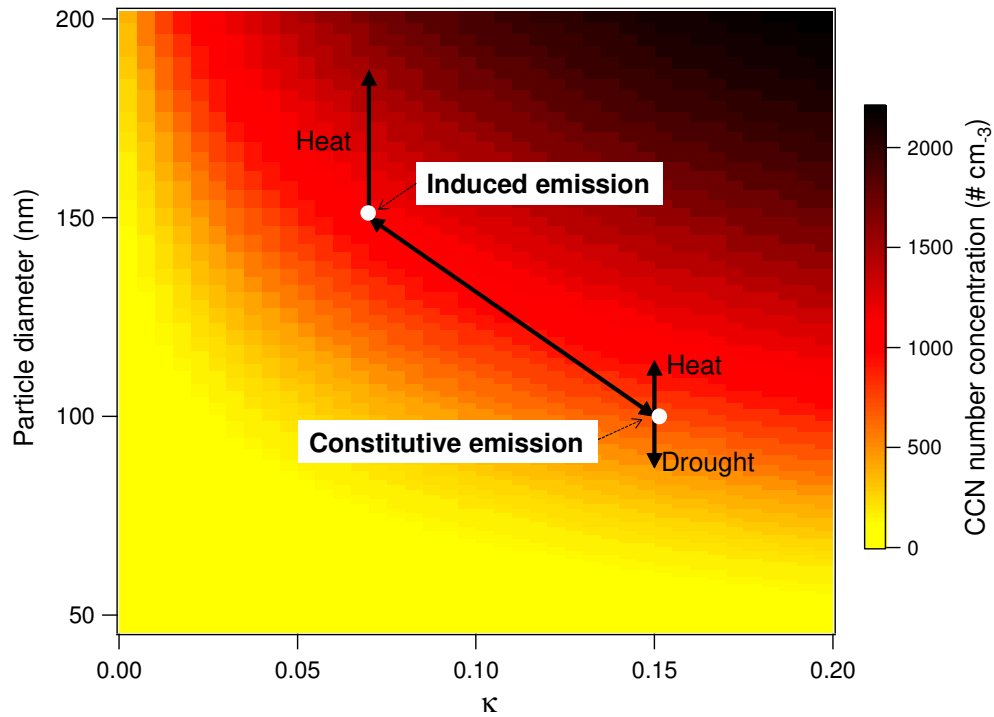

66

67 **Supplementary Figure 7. Impact of various stresses on cloud condensation nuclei**  
 68 **concentrations.** The effects of biotic stress, heat and drought on  $\kappa$  and particle size and cloud  
 69 condensation nuclei (CCN) concentrations are shown on a typical plot of CCN number  
 70 concentrations as a function of size and  $\kappa$ . The effects were calculated based on the results in  
 71 this study (see Methods for details). The left higher and right lower white dots indicate the  
 72 reference case of induced emissions and constitutive emissions at room temperature,  
 73 respectively.

74 **Supplementary Tables**75 Supplementary Table 1. Summary of  $\kappa$  of SOA from sesquiterpene oxidation from CCN measurements in the literature.

76

| Literature                    | Precursor                                                           | $\kappa$ value                                                                                           | Oxidation condition              | Chamber/Conditions                                                                                                         | Comments                                              |
|-------------------------------|---------------------------------------------------------------------|----------------------------------------------------------------------------------------------------------|----------------------------------|----------------------------------------------------------------------------------------------------------------------------|-------------------------------------------------------|
| Hartz et al. <sup>1</sup>     | $\beta$ -caryophyllene,<br>$\alpha$ -humulene,<br>$\alpha$ -cedrene | 0.001-0.009 <sup>a</sup>                                                                                 | Ozonolysis                       | CMU 10 m <sup>3</sup> chamber. VOC: 50-75 ppb, O <sub>3</sub> :100-600 ppb, RH: 5-8%                                       | $\kappa$ was not reported in the paper <sup>e</sup> . |
| Asa-Awuku et al. <sup>2</sup> | $\beta$ -caryophyllene                                              | 0.02-0.05 <sup>a</sup><br>0.01-0.05 <sup>b</sup>                                                         | Ozonolysis                       | CMU 12 m <sup>3</sup> chamber. VOC: 22-32 ppb, O <sub>3</sub> : 300 ppb, RH: 3-8%, T: 22 °C. NO <sub>x</sub> not reported. | $\kappa$ was not reported in the paper.               |
| Alfarra et al. <sup>3</sup>   | $\beta$ -caryophyllene                                              | 0-0.02                                                                                                   | Photooxidation                   | Manchester Univ. 18 m <sup>3</sup> chamber. NO <sub>x</sub> : 26.8-125 ppb, VOC: 31.1-139.9 ppb. RH: ~70%                  | -                                                     |
| Tang et al. <sup>4</sup>      | $\beta$ -caryophyllene                                              | 0.05-0.073 <sup>a</sup><br>0.16-0.22 <sup>b</sup>                                                        | Ozonolysis                       | UCI 90 m <sup>3</sup> chamber. VOC: 5-20 ppb, O <sub>3</sub> : 100-290 ppb, NO <sub>x</sub> : not reported. RH: 0.1%       | Light has negligible effects on $\kappa$ .            |
| Frosch et al. <sup>5</sup>    | $\beta$ -caryophyllene                                              | 0.001-0.005 <sup>a</sup><br>0.003-0.05 <sup>b</sup><br>0.01-0.075 <sup>c</sup><br>0.04-0.09 <sup>d</sup> | Ozonolysis and<br>Photooxidation | PSI 27 m <sup>3</sup> chamber. VOC: 25 ppb O <sub>3</sub> : 300 ppb, RH: 5-10%                                             | $\kappa$ was found to depend on SS.                   |
| Alfarra et al. <sup>6</sup>   | $\beta$ -caryophyllene                                              | 0.009                                                                                                    | Photooxidation                   | Manchester Univ. 18 m <sup>3</sup> chamber. NO <sub>x</sub> : ~25 ppb, VOC: 50/250 ppb. RH: 44-71%                         | -                                                     |

77

78 <sup>a</sup>: The value is for SOA from ozonolysis with OH scavenger (usually 2-butanol was used).79 <sup>b</sup>: The value is for SOA from ozonolysis without OH scavenger .80 <sup>c</sup>: The value is for SOA from photooxidation (OH from O<sub>3</sub> photolysis and O<sub>3</sub> reaction).81 <sup>d</sup>: The value is for SOA from photooxidation (OH from O<sub>3</sub> photolysis and O<sub>3</sub> reaction plus OH from HONO photolysis).82 <sup>e</sup>:  $\kappa$  was calculated using supersaturation and critical activation diameter and a temperature of 298.15 K when  $\kappa$  was not reported in original papers.

83

84 Supplementary Table 2. Summary of  $\kappa$  of SOA from monoterpene oxidation from CCN measurements in the literature.

| Literature                    | Precursor                         | $\kappa$ value                                 | Oxidation condition | Reactor                                   | Comments                                             |
|-------------------------------|-----------------------------------|------------------------------------------------|---------------------|-------------------------------------------|------------------------------------------------------|
| VanReken et al. <sup>7</sup>  | $\alpha$ -pinene                  | 0.014-0.091 <sup>a</sup>                       | Ozonolysis          | CIT 28 m <sup>3</sup> chamber             | $\kappa$ was not reported in the paper. <sup>i</sup> |
| Hartz et al. <sup>1</sup>     | $\alpha$ -pinene                  | 0.028-0.229 <sup>a</sup>                       | Ozonolysis          | CMU 10 <sup>3</sup> chamber               | $\kappa$ was not reported in the paper.              |
| Prenni et al. <sup>8</sup>    | $\alpha$ -pinene                  | 0.1                                            | Ozonolysis          | UCR 7m <sup>3</sup> chamber               | -                                                    |
| Engelhart et al. <sup>9</sup> | $\alpha$ -pinene                  | 0.11-0.14 <sup>b</sup>                         | Ozonolysis          | CMU 12 m <sup>3</sup> chamber             | $\kappa$ was not reported in the paper.              |
| Duplissy et al. <sup>10</sup> | $\alpha$ -pinene                  | 0.09-0.12                                      | Photooxidation      | PSI 27m <sup>3</sup> chamber              | -                                                    |
| Wex et al. <sup>11</sup>      | $\alpha$ -pinene                  | 0.1±0.04                                       | Ozonolysis          | 12L flow reactor                          | $\kappa$ was not reported in the paper.              |
| Juranyi et al. <sup>12</sup>  | $\alpha$ -pinene                  | 0.091±0.01                                     | Photooxidation      | PSI 27m <sup>3</sup> chamber              | -                                                    |
| Massoli et al. <sup>13</sup>  | $\alpha$ -pinene                  | 0.13-0.24 <sup>c</sup>                         | Photooxidation      | Aerosol flow reactor                      | -                                                    |
| Frosch et al. <sup>14</sup>   | $\alpha$ -pinene                  | 0.06-0.16 <sup>c</sup>                         | Photooxidation      | PSI 27m <sup>3</sup> chamber              | -                                                    |
| Lambe et al. <sup>15</sup>    | $\alpha$ -pinene                  | 0.12-0.23 <sup>c</sup>                         | Photooxidation      | 15L PAM flow reactor                      | -                                                    |
| Lambe et al. <sup>16</sup>    | $\alpha$ -pinene                  | 0.12-0.18                                      | Photooxidation      | 15L PAM flow reactor                      | -                                                    |
| Alfarra et al. <sup>6</sup>   | $\alpha$ -pinene                  | 0.10-0.17                                      | Photooxidation      | Univ. Manchester 18m <sup>3</sup> chamber | -                                                    |
| Zhao et al. <sup>17</sup>     | $\alpha$ -pinene                  | 0.10-0.17                                      | Photooxidation      | FZJ 270 m <sup>3</sup> chamber            | -                                                    |
| Hartz et al. <sup>1</sup>     | $\beta$ -pinene                   | 0.033-0.106 <sup>d</sup><br>0.044 <sup>e</sup> | Ozonolysis          | CMU 10 <sup>3</sup> chamber               | $\kappa$ was not reported in the paper.              |
| VanReken et al. <sup>7</sup>  | $\beta$ -pinene                   | 0.02-0.18 <sup>e, f</sup>                      | Ozonolysis          | CIT 28 m <sup>3</sup> chamber             | $\kappa$ was not reported in the paper.              |
| Prenni et al. <sup>8</sup>    | $\beta$ -pinene                   | 0.07-0.10 <sup>e</sup>                         | Ozonolysis          | UCR 7m <sup>3</sup> chamber               | $\kappa$ was not reported in the paper.              |
| Hartz et al. <sup>1</sup>     | limonene                          | 0.017-0.44 <sup>d</sup><br>0.170 <sup>e</sup>  | Ozonolysis          | CMU 10 <sup>3</sup> chamber               | $\kappa$ was not reported in the paper.              |
| VanReken et al. <sup>7</sup>  | limonene                          | 0.05-0.45 <sup>e, f</sup>                      | Ozonolysis          | CIT 28 m <sup>3</sup> chamber             | $\kappa$ was not reported in the paper.              |
| Alfarra et al. <sup>6</sup>   | limonene                          | 0.06 <sup>g</sup>                              | Photooxidation      | Univ. Manchester 18m <sup>3</sup> chamber | -                                                    |
| Hartz et al. <sup>1</sup>     | carene                            | 0.02-0.13 <sup>e</sup>                         | Ozonolysis          | CMU 10 <sup>3</sup> chamber               | $\kappa$ was not reported in the paper.              |
| VanReken et al. <sup>7</sup>  | carene                            | 0.04-0.25 <sup>e, f</sup>                      | Ozonolysis          | CIT 28 m <sup>3</sup> chamber             | $\kappa$ was not reported in the paper.              |
| Prenni et al. <sup>8</sup>    | carene                            | 0.07-0.13 <sup>e</sup>                         | Ozonolysis          | UCR 7m <sup>3</sup> chamber               | $\kappa$ was not reported in the paper.              |
| Alfarra et al. <sup>6</sup>   | myrcene                           | 0.10-0.12                                      | Photooxidation      | Univ. Manchester 18m <sup>3</sup> chamber | -                                                    |
| Engelhart et al. <sup>9</sup> | monoterpene mixtures <sup>h</sup> | 0.08-0.27                                      | Ozonolysis          | CMU 12 m <sup>3</sup> chamber             | $\kappa$ was not reported in the paper.              |
| Zhao et al. <sup>18</sup>     | $\alpha$ -pinene/limonene mixture | 0.10-0.17                                      | Photooxidation      | FZJ 270 m <sup>3</sup> chamber            | -                                                    |

85 <sup>a</sup>:  $\kappa$  here was from Petters and Kreidenweis<sup>19</sup>.86 <sup>b</sup>:  $\kappa$  here was from Engelhart et al.<sup>20</sup>87 <sup>c</sup>: Values were not explicitly provided and were read from the figures in the paper.

88 <sup>d</sup>: The value is for SOA from ozonolysis with OH scavenger (usually 2-butanol was used).  
89 <sup>e</sup>: The value is for SOA from ozonolysis without OH scavenger .  
90 <sup>f</sup>:  $D_{crit}$  and SS data are read from the figures in the paper.  
91 <sup>g</sup>: The authors note that the value is derived from a limited number of measurements.  
92 <sup>h</sup>: Monoterpene mixtures consist of  $\alpha$ -pinene,  $\beta$ -pinene, limonene and carene.  
93 <sup>i</sup>:  $\kappa$  was calculated using supersaturation and critical activation diameter data and a temperature of 298.15 K when  $\kappa$  was not reported in original papers except  
94 otherwise stated.  
95  
96

97 Supplementary Table 3. Number of measurements and measured ratios of monoterpene to  
98 sesquiterpene and  $\kappa$  in Figure. 2.

| Stress status | N(MT/SQT) | N( $\kappa$ ) | MT/SQT                 | $\kappa$  |
|---------------|-----------|---------------|------------------------|-----------|
| Unstressed    | 4         | 3             | 8.37±1.55 <sup>a</sup> | 0.15±0.02 |
| Intermediate  | 4         | 6             | 2.74±0.35              | 0.09±0.01 |
| Stressed      | 20        | 48            | 0.32±0.05              | 0.07±0.01 |

99 <sup>a</sup>: Standard deviation.

100 MT: monoterpene; SQT: sesquiterpene; N(MT/SQT) and N( $\kappa$ ): number of measurements for  
101 the ratios of monoterpene to sesquiterpene and for  $\kappa$ , respectively.

102 Supplementary Table 4. Number of measurements and measured total VOC, particle size and  
 103  $\kappa$  in Figure. 3.

| Emission type         | Temperature (°C) | N(VOC) | N(size) | N( $\kappa$ ) | TVOC (ppbC)           | Size (nm) | $\kappa$   |
|-----------------------|------------------|--------|---------|---------------|-----------------------|-----------|------------|
| Constitutive emission | 20               | 6      | 6       | -             | 19.2±2.1 <sup>a</sup> | 28.9±0.7  | -          |
|                       | 25               | 4      | 6       | 3             | 40.3±6.2              | 55.0±2.3  | 0.15±0.02  |
|                       | 35               | 2      | 3       | 4             | 84.2±9.6              | 69.8±1.0  | 0.11±0.03  |
| Induced emission      | 22               | 19     | 15      | 48            | 83.5±19.3             | 60.2±8.3  | 0.073±0.01 |
|                       | 29               | 12     | 9       | 11            | 236.4±24.2            | 85.7±1.5  | 0.065±0.01 |
|                       | 34               | 8      | 6       | 15            | 731.4±243.0           | 116.1±5.6 | 0.059±0.01 |

104 <sup>a</sup>: Standard deviation.

105 N(VOC), N(size), N( $\kappa$ ): number of measurements for total VOC, particle size and  $\kappa$ ,  
 106 respectively.

107

108

## 109 **Supplementary References**

- 110 1 Hartz, K. E. H. *et al.* Cloud condensation nuclei activation of monoterpene and  
111 sesquiterpene secondary organic aerosol. *J. Geophys. Res.-Atmos.* **110**, D14208  
112 (2005).
- 113 2 Asa-Awuku, A., Engelhart, G. J., Lee, B. H., Pandis, S. N. & Nenes, A. Relating CCN  
114 activity, volatility, and droplet growth kinetics of beta-caryophyllene secondary  
115 organic aerosol. *Atmos. Chem. Phys.* **9**, 795-812 (2009).
- 116 3 Alfarra, M. R. *et al.* The effect of photochemical ageing and initial precursor  
117 concentration on the composition and hygroscopic properties of beta-caryophyllene  
118 secondary organic aerosol. *Atmos. Chem. Phys.* **12**, 6417-6436 (2012).
- 119 4 Tang, X., Cocker, D. R., III & Asa-Awuku, A. Are sesquiterpenes a good source of  
120 secondary organic cloud condensation nuclei (CCN)? Revisiting beta-caryophyllene  
121 CCN. *Atmos. Chem. Phys.* **12**, 8377-8388 (2012).
- 122 5 Frosch, M. *et al.* CCN activity and volatility of beta-caryophyllene secondary organic  
123 aerosol. *Atmos. Chem. Phys.* **13**, 2283-2297 (2013).
- 124 6 Alfarra, M. R. *et al.* Water uptake is independent of the inferred composition of  
125 secondary aerosols derived from multiple biogenic VOCs. *Atmos. Chem. Phys.* **13**,  
126 11769-11789 (2013).
- 127 7 VanReken, T. M., Ng, N. L., Flagan, R. C. & Seinfeld, J. H. Cloud condensation  
128 nucleus activation properties of biogenic secondary organic aerosol. *J. Geophys. Res.-*  
129 *Atmos.* **110**, D07206 (2005).
- 130 8 Prenni, A. J., Petters, M. D., Kreidenweis, S. M., DeMott, P. J. & Ziemann, P. J.  
131 Cloud droplet activation of secondary organic aerosol. *J. Geophys. Res.-Atmos.* **112**,  
132 D10223 (2007).
- 133 9 Engelhart, G. J., Asa-Awuku, A., Nenes, A. & Pandis, S. N. CCN activity and droplet  
134 growth kinetics of fresh and aged monoterpene secondary organic aerosol. *Atmos.*  
135 *Chem. Phys.* **8**, 3937-3949 (2008).
- 136 10 Duplissy, J. *et al.* Cloud forming potential of secondary organic aerosol under near  
137 atmospheric conditions. *Geophys. Res. Lett.* **35**, L03818 (2008).
- 138 11 Wex, H. *et al.* Towards closing the gap between hygroscopic growth and activation  
139 for secondary organic aerosol: Part 1-Evidence from measurements. *Atmos. Chem.*  
140 *Phys.* **9**, 3987-3997 (2009).
- 141 12 Juranyi, Z. *et al.* Influence of gas-to-particle partitioning on the hygroscopic and  
142 droplet activation behaviour of alpha-pinene secondary organic aerosol. *Phys. Chem.*  
143 *Chem. Phys.* **11**, 8091-8097 (2009).
- 144 13 Massoli, P. *et al.* Relationship between aerosol oxidation level and hygroscopic  
145 properties of laboratory generated secondary organic aerosol (SOA) particles.  
146 *Geophys. Res. Lett.* **37**, L24801 (2010).
- 147 14 Frosch, M. *et al.* Relating cloud condensation nuclei activity and oxidation level of  
148 alpha-pinene secondary organic aerosols. *J. Geophys. Res.-Atmos.* **116**, D22212  
149 (2011).

150 15 Lambe, A. T. *et al.* Laboratory studies of the chemical composition and cloud  
151 condensation nuclei (CCN) activity of secondary organic aerosol (SOA) and oxidized  
152 primary organic aerosol (OPOA). *Atmos. Chem. Phys.* **11**, 8913-8928 (2011).

153 16 Lambe, A. T. *et al.* Characterization of aerosol photooxidation flow reactors:  
154 heterogeneous oxidation, secondary organic aerosol formation and cloud  
155 condensation nuclei activity measurements. *Atmos. Meas. Tech.* **4**, 445-461 (2011).

156 17 Zhao, D. F. *et al.* Size-dependent hygroscopicity parameter ( $\kappa$ ) and chemical  
157 composition of secondary organic cloud condensation nuclei. *Geophys. Res. Lett.* **42**,  
158 10920-10928 (2015).

159 18 Zhao, D. F. *et al.* Cloud condensation nuclei activity, droplet growth kinetics, and  
160 hygroscopicity of biogenic and anthropogenic secondary organic aerosol (SOA).  
161 *Atmos. Chem. Phys.* **16**, 1105-1121 (2016).

162 19 Petters, M. D. & Kreidenweis, S. M. A single parameter representation of hygroscopic  
163 growth and cloud condensation nucleus activity. *Atmos. Chem. Phys.* **7**, 1961-1971  
164 (2007).

165 20 Engelhart, G. J., Moore, R. H., Nenes, A. & Pandis, S. N. Cloud condensation nuclei  
166 activity of isoprene secondary organic aerosol. *J. Geophys. Res.-Atmos.* **116**, D02207  
167 (2011).

168

169
